# Supplementary material for: Enhanced polysulfide adsorption and conversion on FeS 2 @CNF-modified separator for Li–S batteries
Source: Royal Society of Chemistry journal article supplement (doi:10.1039/d5nj03940a), 2026-01-01
Supplement: d5nj03940a1.pdf [file d5nj03940a1.pdf]

## Supporting Information

### **Enhanced Polysulfides Adsorption and Conversion on FeS<sub>2</sub>@CNF Modified Separator for Li-S Batteries**

Daming Li,<sup>a</sup> Yuzheng Li,<sup>a</sup> Chengxiao Xu,<sup>a</sup> Shuaiquan Zhao,<sup>a</sup> Yuchen Zhang,<sup>a</sup> Peipei Huo,<sup>\*a</sup>

<sup>a</sup> School of Physics and Optoelectronic Engineering, Shandong University of Technology, Xincun West Road 266, Zibo 255000, China;

\* Corresponding authors. *E-mail* addresses: peipeihuo@sdut.edu.cn (P. Huo).

# Experimental

## 1. Materials

1,2-Dimethoxyethane (DME,  $C_4H_{10}O_2$ , 99.9%), 1,3-Dioxolane(DOL,  $C_3H_6O_2$ , 99.9%), Polyvinylidene fluoride (PVDF,  $(C_2H_2F_2)_n$ ) were purchased from Duoduo Chemical Reagent Co. in Suzhou, China. Ferric chloride ( $FeCl_3 \cdot 6H_2O$ , AR, 99 %), Sodium chloride (NaCl, AR), polyacrylonitrile (PAN,  $(C_3H_3N)_n$ ), Sulfur (S, AR 99.98%), and n,n-dimethylformamide (DMF,  $C_3H_7NO$ , AR, 99.5%) were purchased from Shanghai Aladdin Biochemical Technology Co. The above reagents do not require further purification and all compounds were used immediately.

## 2. Synthesis of $FeS_2@CNF$

PAN nanofibers were prepared by electrospinning. First, 1.5g PAN powder was dissolved in 8 mL DMF solvent and magnetically stirred for 12h to form a uniform viscous solution. Transfer the viscous solution to a 10 mL syringe and connect it with a 21-gauge needle. The electrospinning parameters were set as follows: the distance between the needle and the fluid collector was 15.5 cm, the voltage was set to 19 kV, and the advancing speed was  $0.1 \text{ mm min}^{-1}$ . During the electrospinning process, the temperature is maintained at 25 degrees Celsius and the relative humidity at 38%. The PAN nanofibers were cut into sheets and pre-oxidized at  $250^\circ\text{C}$  for 2h. In  $N_2$  atmosphere, the pre-oxidized PAN was carbonized at  $800^\circ\text{C}$  for 2h to obtain CNF.

CNF was placed in a mixture of  $FeCl_3$  and NaCl and stood at  $60^\circ\text{C}$  for 12h. Wash with deionized water for many times and dry under vacuum at  $25^\circ\text{C}$  to obtain  $FeOOH@CNF$ . Then,  $FeOOH@CNF$  and S powder were mixed at a mass ratio of 1:4 and heated to  $350^\circ\text{C}$  in  $N_2$  atmosphere for 2h to obtain the final product  $FeS_2@CNF$ . The preparation methods for  $FeS_2$  followed the same procedure as described above, except that CNF was omitted.

## 3. Synthesis of $FeS_2@CNF$ modified separator

Initially, the sample ( $FeS_2@CNF$ ), carbon black, and binder (polyvinylidene fluoride, PVDF) were dispersed in an appropriate amount of N-methylpyrrolidone (NMP) in a mass ratio of 7:2:1. The mixture was ground in a mortar for over 30 mins until a homogeneous slurry was achieved. This slurry was then applied to a commercial PP separator (Celgard-2400) using a spatula with 100-micron scale, resulting in the fabrication of a modified separator, denoted as  $FeS_2@CNF//PP$ . The modified separators were dried overnight in a vacuum oven at  $40^\circ\text{C}$  and then cut into discs with a diameter of 19.0 mm. The average load mass of the active material on the upper surface of the modified diaphragm is  $0.45 \text{ mg cm}^{-2}$ .

## 4. Materials Characterization

The samples underwent morphological characterization and elemental mapping analysis using field emission scanning electron microscopy (SEM; FEI, Quantum 250) and transmission electron microscopy (TEM; JEOL, JEM-2100F). The crystalline phase of  $FeS_2@CNF$  was analyzed by X-ray diffraction

(XRD, Panalytical Empyrean). X-ray photoelectron spectroscopy (XPS, Shimadzu/Kratos AXIS SUPRA+) was employed to ascertain the chemical state of the elements present on the sample surface. A contact angle/surface tension meter (Lauda Scientific LSA100) was utilized to investigate the affinity of the samples for the electrolyte. A UV spectrophotometer (Shimadzu, U-4100) was employed to analyze the concentration change of  $\text{Li}_2\text{S}_6$  solution after the adsorption of various materials.

## 5. Visual adsorption test of lithium polysulfides

$\text{Li}_2\text{S}_6$  solution was selected as a representative of LiPSs for visual adsorption test. A specific amount of sulfur powder and  $\text{Li}_2\text{S}$  in a molar ratio of 5:1 was dissolved in a mixed solvent of 1,2-dimethoxyethane (DME) and 1,3-dioxolane (DOL) ( $v/v = 1:1$ ). The resulting solution was stirred at  $60^\circ\text{C}$  for 24 h to yield a 0.2 mM  $\text{Li}_2\text{S}_6$  solution. All procedures were conducted within a glove box. The  $\text{Li}_2\text{S}_6$  solution was subsequently diluted to  $2 \text{ mmol L}^{-1}$ . Then, 15 mg of  $\text{FeS}_2@\text{CNF}$  and  $\text{FeS}_2$  were separately added to 4 mL of  $\text{Li}_2\text{S}_6$  solution. The mixture was left to stand for 8 h to ensure thorough completion of the adsorption process. During this time, the color change of the  $\text{Li}_2\text{S}_6$  solution was observed. The supernatant of the adsorbed solution was extracted for UV-Vis spectral analysis.

## 6. Electrochemical measurements

The CR2032 coin cell was assembled in an argon-filled glove box. Commercial lithium metal served as the anode, and modified Celgard 2400 was employed as the separator. The electrolyte comprised a 1.0 M LiTFSI solution ( $v/v = 1:1$ ) with a 1 wt%  $\text{LiNO}_3$  additive. Galvanostatic charge-discharge (GCD) and rate performance tests were conducted using a LAND 2100CT test system, with a voltage range of 1.7 to 2.8 V at various current densities ( $1\text{C} = 1675 \text{ mAh g}^{-1}$ ). Cyclic voltammetry (CV) and electrochemical impedance spectroscopy (EIS) tests were performed using a CHI760E electrochemical workstation. The voltage range for the CV curve test was 1.7 to 2.8 V, with a scan rate range of 0.1 to  $0.5 \text{ mV s}^{-1}$ . The frequency range for the EIS test was 0.01 to 10 kHz.

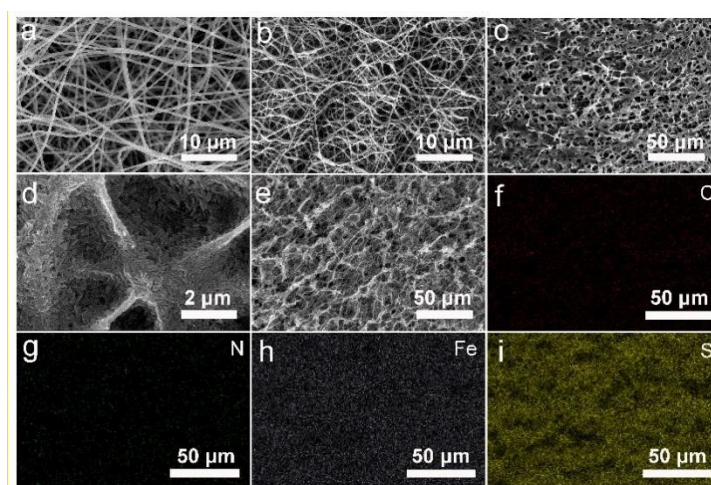

**Fig. S1** SEM images of (a) PAN, (b) CNF, (c) and (d)  $\text{FeOOH}@\text{CNF}$  with different magnifications. (e)  $\text{FeS}_2@\text{CNF}$  and EDS elemental mapping of C, N, O, Fe, S in  $\text{FeS}_2@\text{CNF}$ .

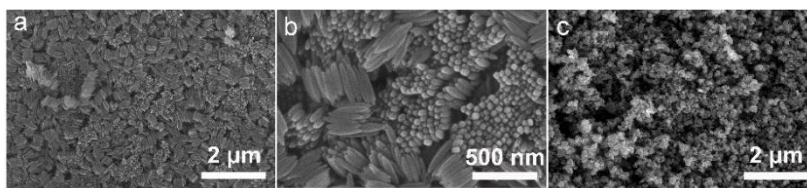

**Fig. S2** (a) and (b) SEM images of FeOOH at different magnifications. (c) SEM image of FeS<sub>2</sub>.

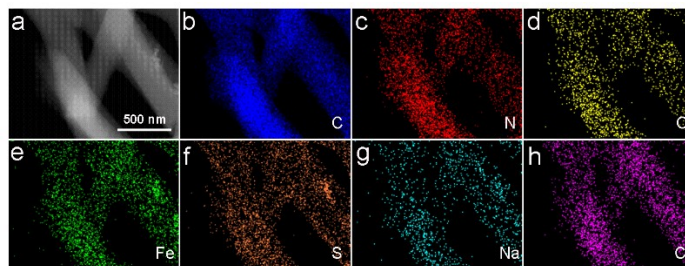

**Fig. S3** HAADF-STEM and corresponding areal elemental mapping images of FeS<sub>2</sub>@CNF.

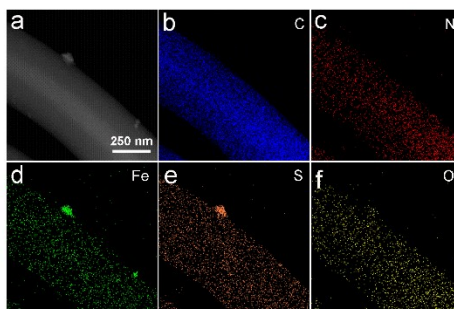

**Fig. S4** HAADF-STEM and corresponding areal elemental mapping images of FeS<sub>2</sub>@CNF.

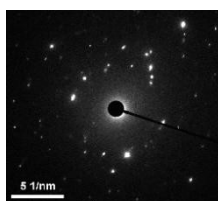

**Fig. S5** SAED image of FeS<sub>2</sub>@CNF.

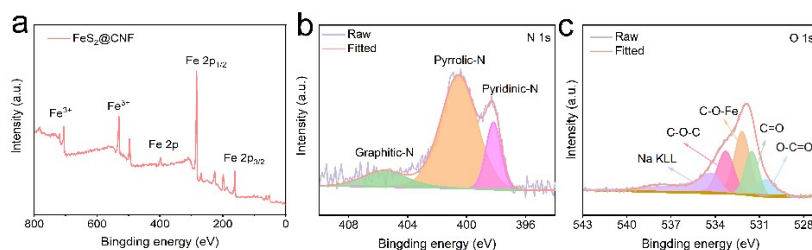

**Fig. S6** (a) Total XPS spectra of FeS<sub>2</sub>@CNF. (b and c) High-resolution XPS spectra of N 1s, O 1s.

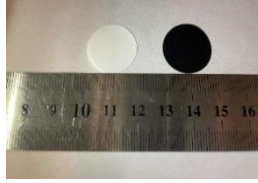

**Fig. S7** Digital images of conventional PP separator and  $\text{FeS}_2\text{@CNF//PP}$  separator.

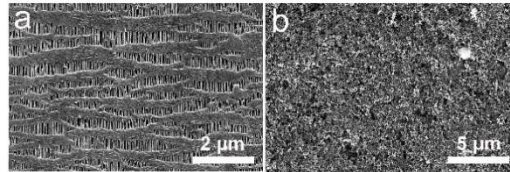

**Fig. S8** SEM images of (a) the pristine PP separator, (b)  $\text{FeS}_2\text{@CNF//PP}$  separator.

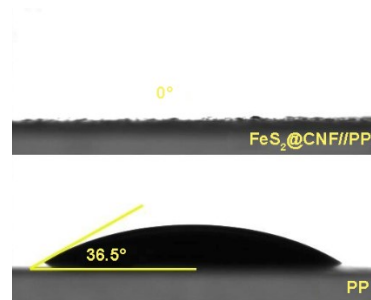

**Fig. S9** Contact angles of the pristine PP separator and  $\text{FeS}_2\text{@CNF//PP}$  separator.

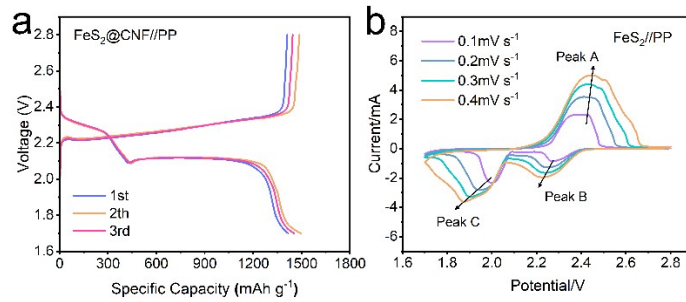

**Fig. S10** (a) GCD profiles at 0.1C of  $\text{FeS}_2\text{@CNF//PP}$ . (b) CV curves at different scan rates.

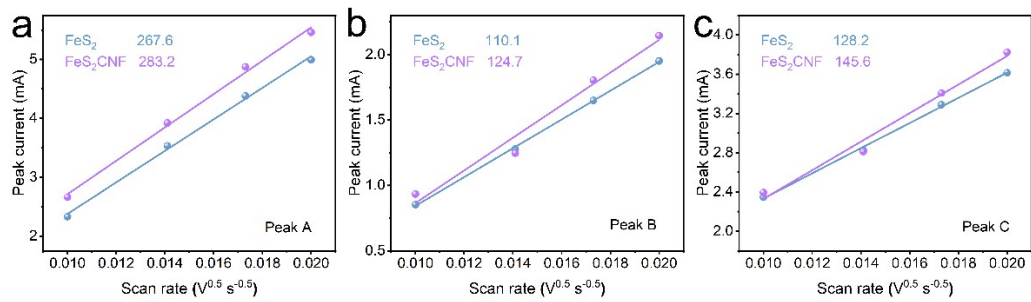

**Fig. S11** (a) Relationships between CV peak current and scanning rate.

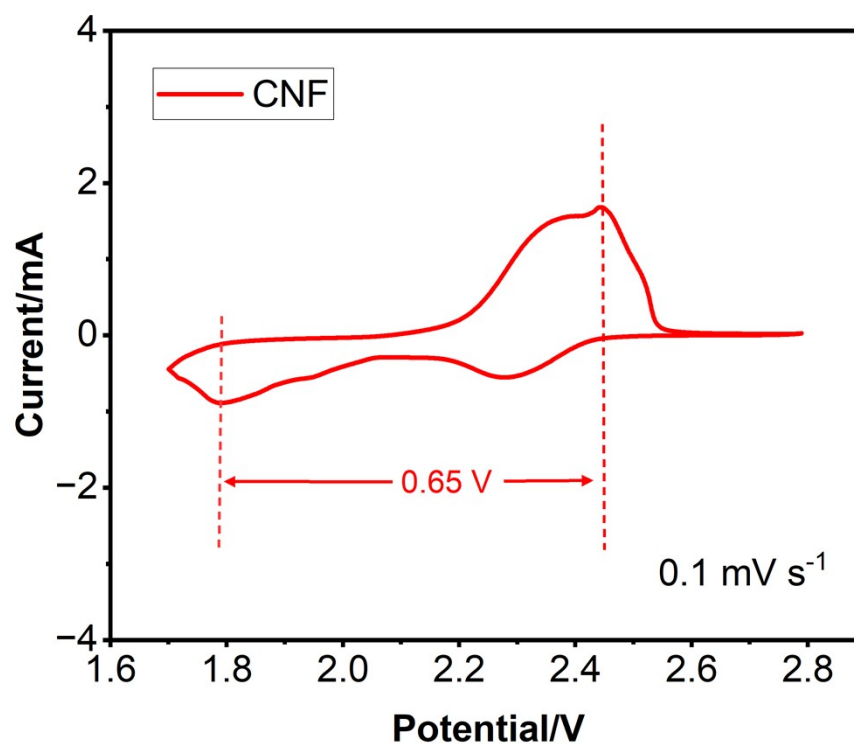

**Fig. S12** CV curves of CNF at  $0.1 \text{ mV s}^{-1}$

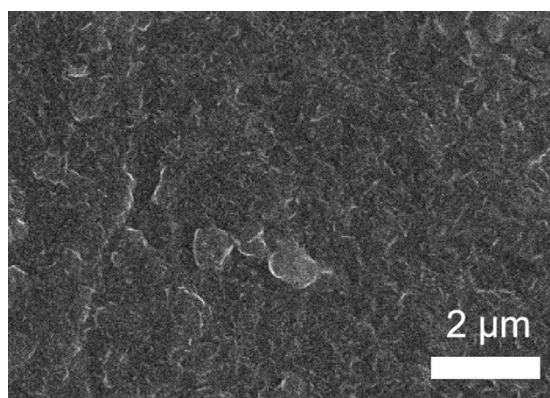

**Fig. S13** SEM of lithium sheets after 350 cycles at 0.5 C
